# Supplementary material for: From industrial by-products to high-value materials: synthesizing sulfur-rich polymers for lithium–sulfur battery cathodes from the C5 fraction and sulfur
Source: Royal Society of Chemistry journal article supplement (doi:10.1039/d4py00980k), 2024-11-21
Supplement: d4py00980k1.pdf [file d4py00980k1.pdf]

## Supplementary Information

# From Industrial By-Products to High-Value Materials: Synthesizing Sulfur-Rich Polymers for Lithium-Sulfur Battery Cathodes from C5 Fraction and Sulfur

Xingwei Xun,<sup>a</sup> Jinhong Jia,<sup>a</sup> Xi-Cun Wang,<sup>a</sup> Xiaofeng Wu<sup>\*b</sup> and Zheng-Jun Quan<sup>\*a</sup>

<sup>a</sup> *Gansu International Scientific and Technological Cooperation Base of Water-Retention Chemical Functional Materials, College of Chemistry and Chemical Engineering, Northwest Normal University, Lanzhou 730070, China.*

<sup>b</sup> *Department of Chemistry, University of Liverpool, Liverpool L69 7ZD, UK.*

\* Corresponding Authors, E-mail: [xfwu@liverpool.ac.uk](mailto:xfwu@liverpool.ac.uk); [quanzhengjun@hotmail.com](mailto:quanzhengjun@hotmail.com)

## 1. Experimental Section

### 1.1 Materials

Sulfur ( $S_8$ ;  $\geq 99.5\%$ ; Shanghai Chemical Reagent Co., Ltd., China).  $Zn(DTC)_2$  (Zinc diethyldithiocarbamate;  $\geq 99\%$ ; Shanghai Bide Pharmaceuticals Science & Technology Co., Ltd., China). C5 fraction (PetroChina Lanzhou Petrol-Chemical Industry Company, the detailed composition is shown in Table S1). *N*-methyl-2-pyrrolidone (NMP), 1,2-dimethoxyethane (DME), 1,3-dioxolane (DOL), Lithium metal (Li), Poly(vinylidene fluoride) (PVDF 900), Ketjen Black (ECP-600 JD), Diaphragm (Celgard 2400), Cell shell (CR2032, 316 stainless steel), and carbon-coated aluminum foil (Al) were all of battery grade, Guangdong Zhuguang New Energy Technology Co., Ltd, China. The electrolyte was prepared and utilized within a glovebox, composed of a 1 M LiTFSI/0.1 M  $LiNO_3$ , dissolved in a mixed solvent of 1,3-dioxolane (DOL) and 1,2-dimethoxyethane (DME) (v/v 1:1).

**Table S1.** Composition of C5 fraction

| Compound type | Compound name                                                                                                               | Content (wt%) |
|---------------|-----------------------------------------------------------------------------------------------------------------------------|---------------|
| Diene         | 1,4-Pentadiene, 1,3-Butadiene, 1,3-Pentadiene, Cyclopentadiene, Isoprene, Dicyclopentadiene                                 | 58.05         |
| Monoene       | 2-Butene, 1-Butene + Isobutene, 3-Methyl-1-Butene, 1-Pentene, Cyclopentene, 2-Pentene, 2-Methyl-1-Butene, 2-Methyl-2-Butene | 18.98         |
| Alkane        | n-Butane, Neopentane, Isobutane, n-Pentane, Isopentane                                                                      | 18.75         |
| Alkyne        | Vinylacetylene, Butyne                                                                                                      | 1.36          |
| Others        | Unknown C4, Benzene, Sum of all light components up to C4                                                                   | 5.61          |

### 1.2 Synthesis of Poly(S-C5)

A typical procedure for the catalytic inverse vulcanization reaction involved the following steps: within the reactor, 10 grams of sulfur, 10 grams of C5 fraction (calculated based on unsaturated hydrocarbons), and 0.2 grams of  $Zn(DTC)_2$  (1 wt%) were introduced, after which 10 mL of toluene was added as a solvent. Subsequently, the temperature was raised to 135 °C, and the reaction was carried out under cold reflux conditions. The heating was terminated as soon as the reaction system initiated gelation.

### 1.3 Materials Characterization Methods

#### 1.3.1 Structural Characterization

The functional groups of the polymers were characterized using Fourier transform infrared spectroscopy (FT-IR, Digilab ft-3000) within the spectral range of 400-4000  $cm^{-1}$ . Nuclear magnetic resonance spectroscopy (NMR, Varian Mercury -400 Plus) was employed to determine the elemental composition and structure of the polymers, using deuterated chloroform ( $CDCl_3$ ) as the deuterated solvent. Chemical shifts (ppm) were recorded with tetramethylsilane (TMS) as the internal standard, and the solvent peak was recorded at 7.26 ppm for  $^1H$ -NMR. The crystalline structure of the polymers was investigated using X-ray diffraction (XRD, Bruker D8 Advance) with Cu-targeted  $K\alpha$ -rays ( $\lambda = 1.5418 \text{ \AA}$ ), scanning within a range of 5-80° at operating voltages of 40 kV and 100 mA. X-ray photoelectron spectroscopy (XPS, Thermo Scientific K-Alpha) was utilized to analyze the elemental species, valence

states, and content on the surfaces of the polymers.

### **1.3.2 Thermal Characterization**

The thermal stability of the polymers was investigated via thermogravimetric analysis (TGA, HITACHI STA200) in a nitrogen atmosphere. The assessment was performed at a heating rate of 10 °C min<sup>-1</sup>, ranging from room temperature to 800 °C. Differential scanning calorimetry (DSC, TA DSC25) was employed to examine the thermal transition behavior of the polymers under a nitrogen atmosphere. The temperature scope was between -50 °C and 150 °C, with a heating and cooling rate of 5 °C min<sup>-1</sup>.

### **1.3.3 Microstructural Characterization**

The microscopic morphology of the polymers and the composition of their microregions were examined using scanning electron microscopy (SEM, ZEISS GeminiSEM 300), complemented by energy-dispersive X-ray diffraction spectrometry (EDS). To enhance conductivity, the sample surfaces were coated with a layer of gold. The internal fine structure of the material was investigated using spherical aberration-corrected transmission electron microscopy (AC-TEM, FEI Theims Z).

## **1.4 Electrochemical Testing of Materials**

### **1.4.1 Cell Preparation and Assembly**

To eliminate any residual sulfur, the polymer was immersed in CS<sub>2</sub> before the preparation of the electrode paste. The polymer, Ketjen Black (ECP-600 JD), and poly(vinylidene fluoride) (PVDF 900) were manually grounded together in a mortar and pestle for 30 minutes in a ratio of 8:1:1. Subsequently, an appropriate amount of anhydrous *N*-methyl-2-pyrrolidone (NMP) was added to the mixture, and further grinding was conducted for 30 minutes to ensure the complete dissolution of PVDF 900. The resulting slurry was coated onto a smooth, flat, single-sided carbon-coated aluminum foil and then vacuum-dried at 60 °C for 24 hours. The resulting electrode was stamped into a 12 mm disc, and the active sulfur loading on all cathodes was controlled by approximately 2 mg cm<sup>-2</sup>. The electrode was then placed in a glovebox for 12 hours to remove any residual oxygen and water from its surface. The CR 2032 coin cell was assembled in an argon-filled glovebox, using lithium as the negative electrode, Celgard 2400 polymer film as the separator, and 30 μL mg<sup>-1</sup> of electrolyte. After allowing the cell to rest for 12 hours, it was subjected to testing.

### **1.4.2 Electrochemical Testing**

Cyclic voltammetry (CV) experiments were performed using a Shanghai Chenhua electrochemical workstation. The CV scan rate was configured between 0.1 and 0.5 mV s<sup>-1</sup>, with a voltage sweep extending from 1.7 to 2.8 V (vs. Li/Li<sup>+</sup>). Constant-current charging/discharging tests were conducted on a Neware test system. within the voltage range of 1.8 to 2.7 V (vs. Li/Li<sup>+</sup>) at different C rates (1 C = 1675 mAh g<sup>-1</sup>, based on the mass of active sulfur). All tests were conducted at ambient temperature.

## 2. Results and Discussion

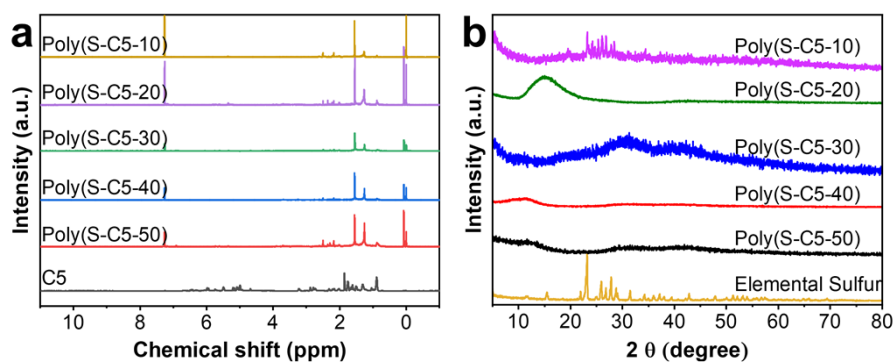

**Figure S1.** a)  $^1\text{H-NMR}$  spectrum of Poly(S-C5-x). b) X-ray diffraction characterization of Poly(S-C5-x).

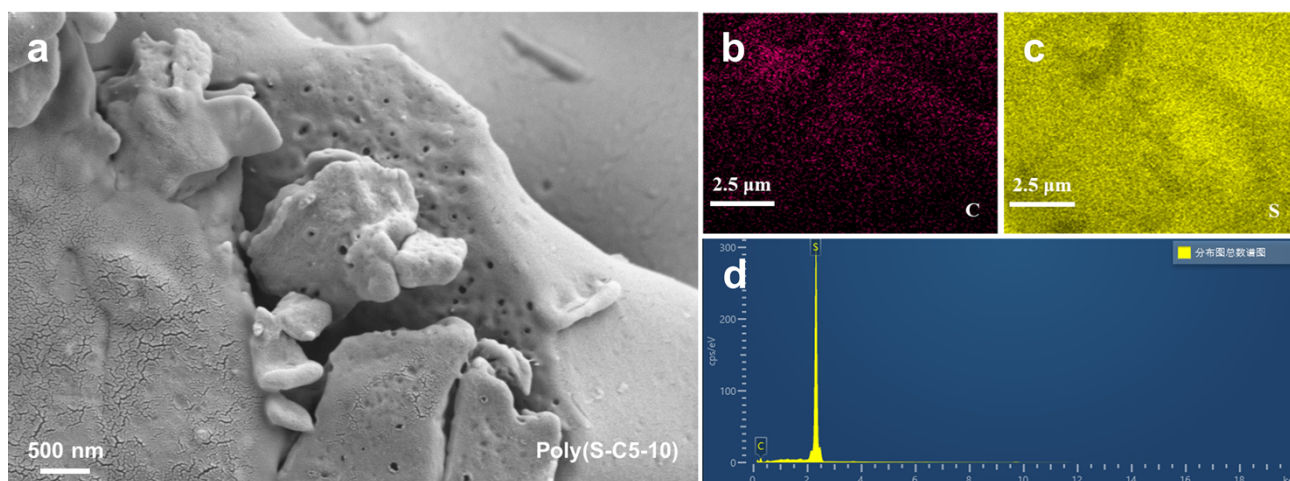

**Figure S2.** Microstructural characterization of Poly(S-C5-10). a) Scanning electron microscopy (SEM). b), c), and d) X-ray diffraction spectrometry (EDS).

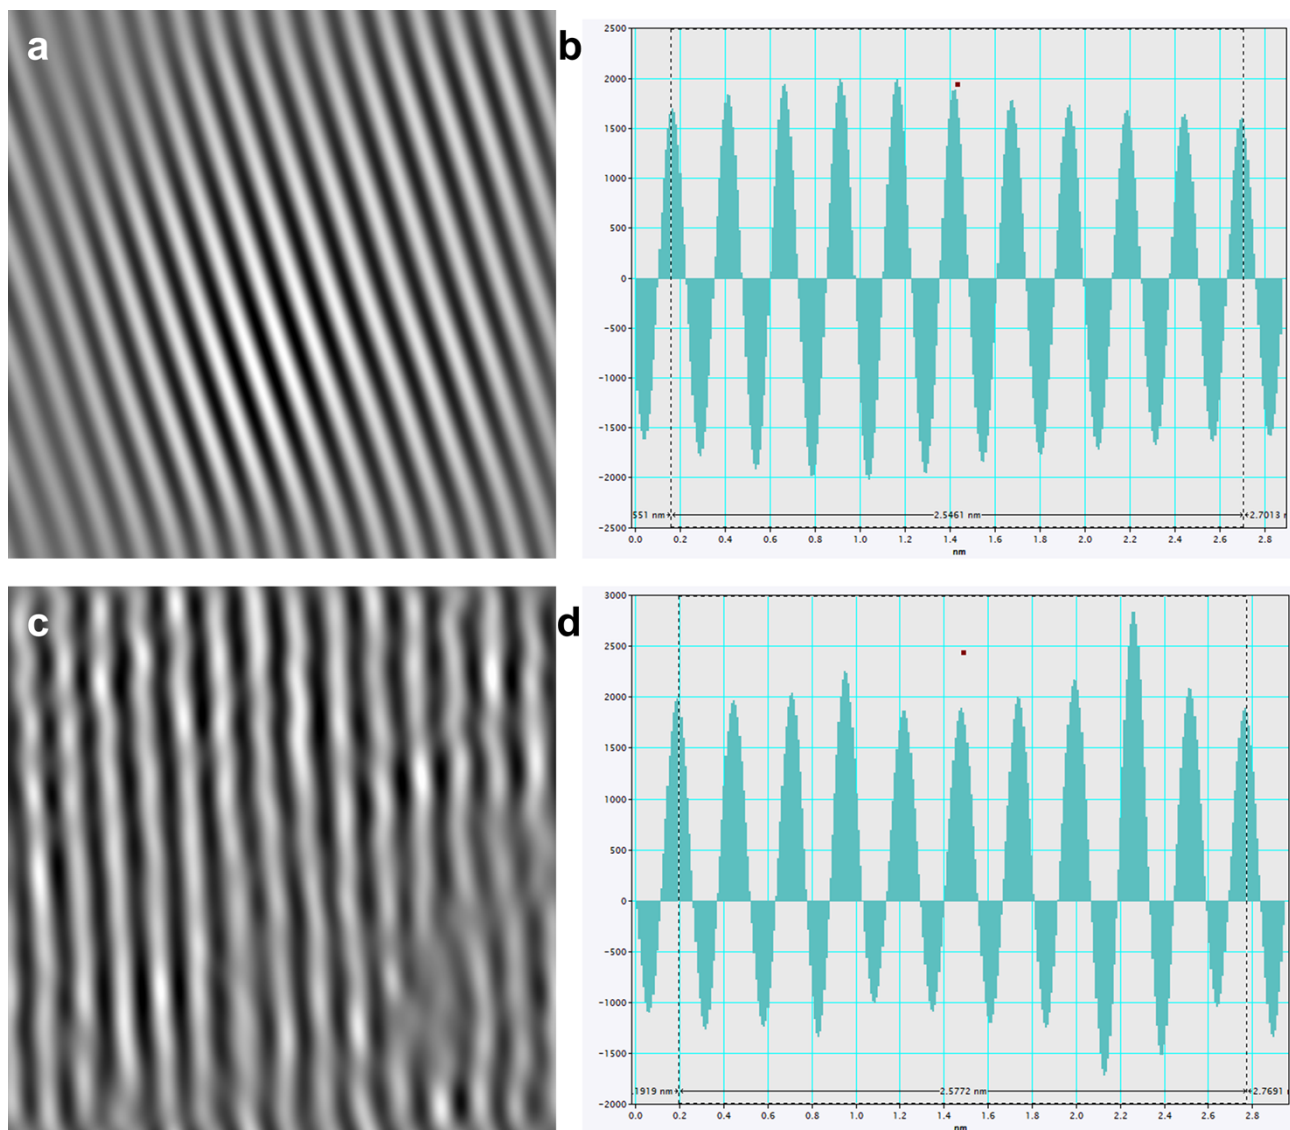

**Figure S3.** Spherical aberration-corrected transmission electron microscopy (AC-TEM) of Poly(S-C5-10). a) and c) Inverse fast Fourier transform. b) and d) Lattice spacing.
